# Supplementary material for: PGE2 inhibits TIL expansion by disrupting IL-2 signalling and mitochondrial function
Source: PubMed Central journal article supplement (PMC11078736; doi:10.1038/s41586-024-07352-w), 2024-04-24

a

Gating strategy for analysis of CD4+/CD8+ Peripheral Blood Lymphocytes (PBLs)

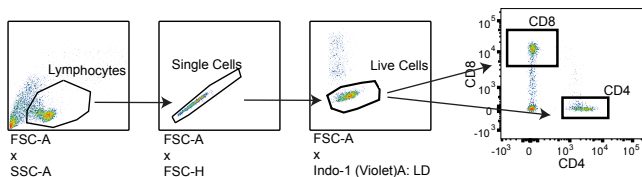

b

Gating strategy for analysis of CD4+/CD8+ Tumour-infiltrating T cells (TILs)

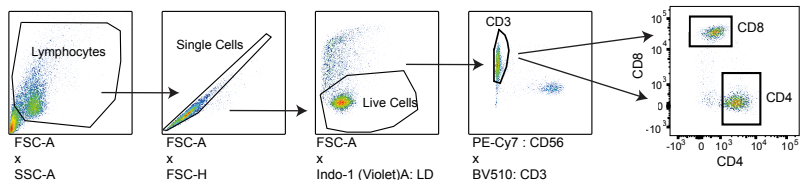

c

Cell sorting gating strategy for Tumour-infiltrating T cells (TILs)

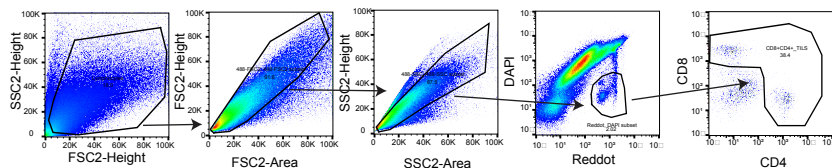

Supplement: 41586_2024_7352_MOESM2_ESM.pdf [file 41586_2024_7352_MOESM2_ESM.pdf]
