# Supplementary material for: PGE2 inhibits TIL expansion by disrupting IL-2 signalling and mitochondrial function
Source: PubMed Central journal article supplement (PMC11078736; doi:10.1038/s41586-024-07352-w), 2024-04-24

In Figure 2k

Boxes indicate regions shown in the figure.  
 $\beta$ -actin band for each gel is shown on the right.

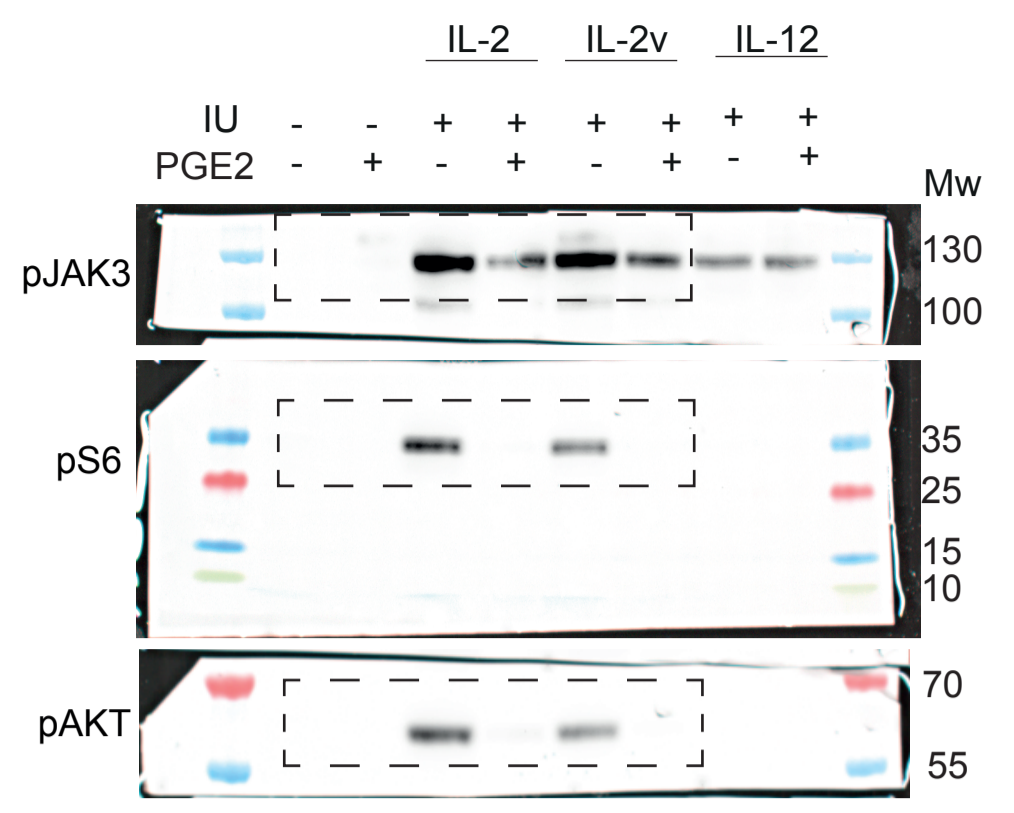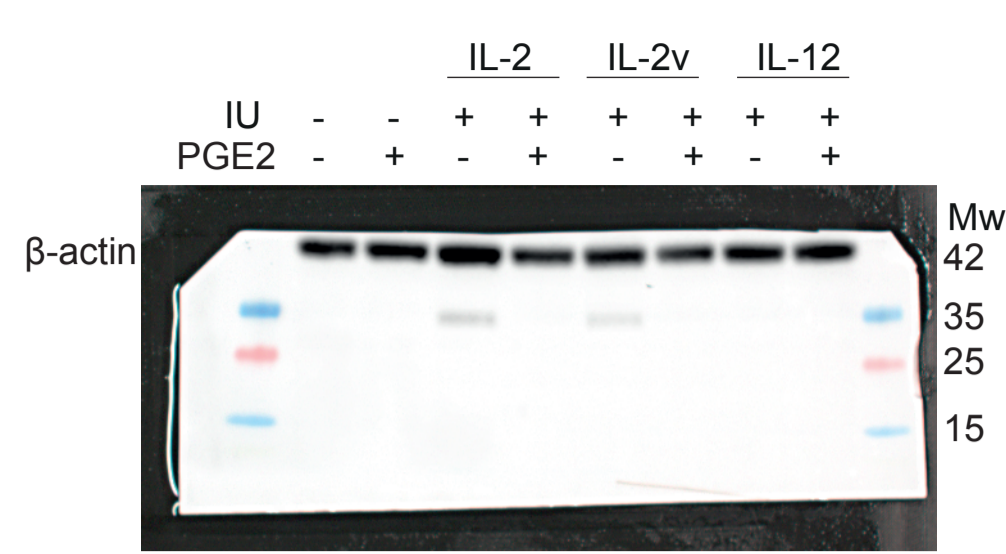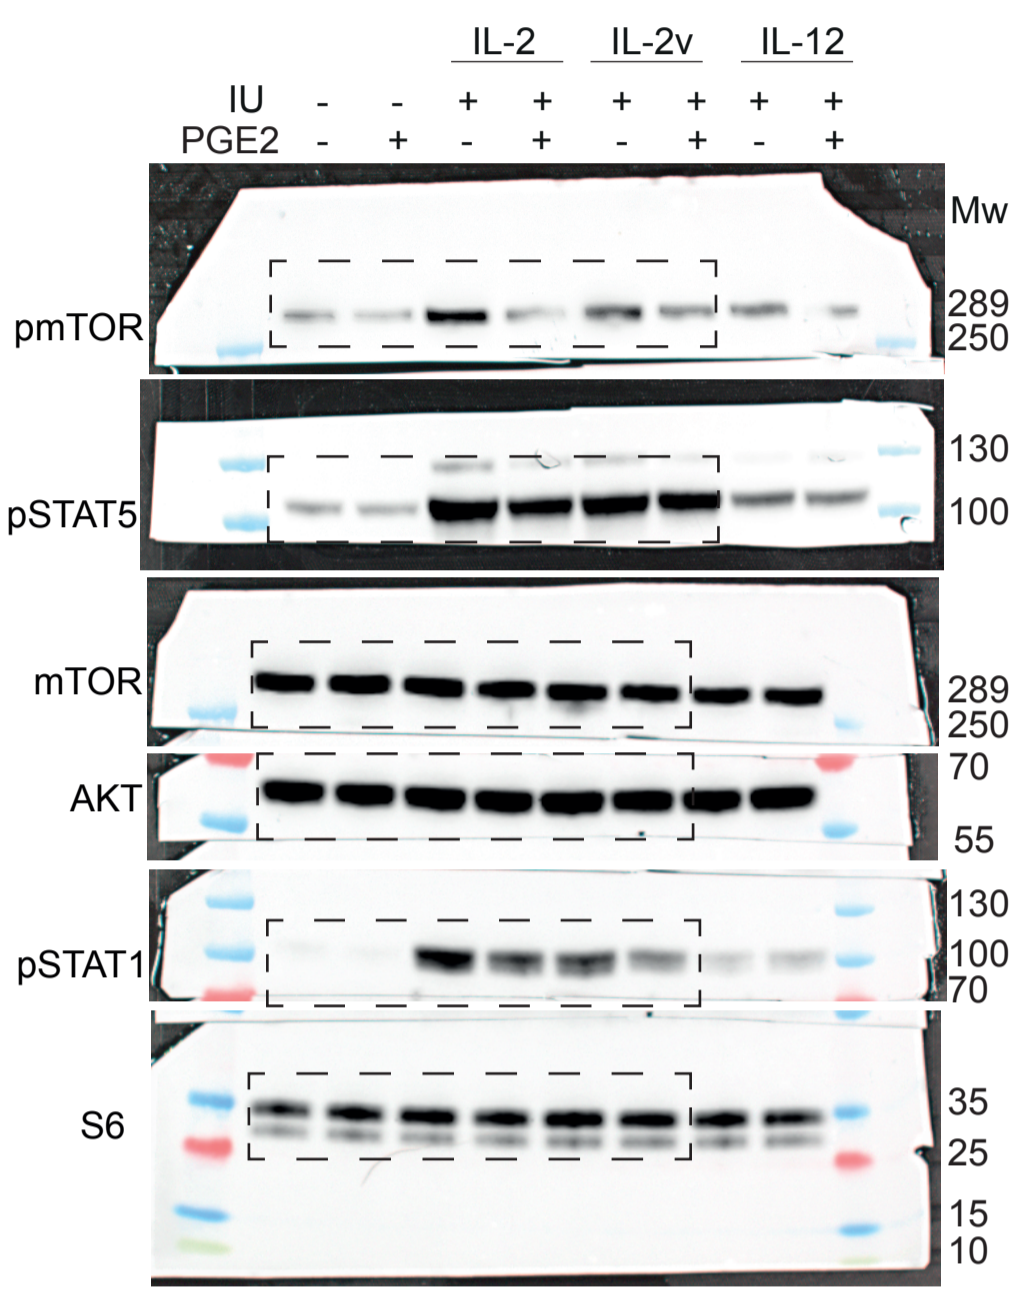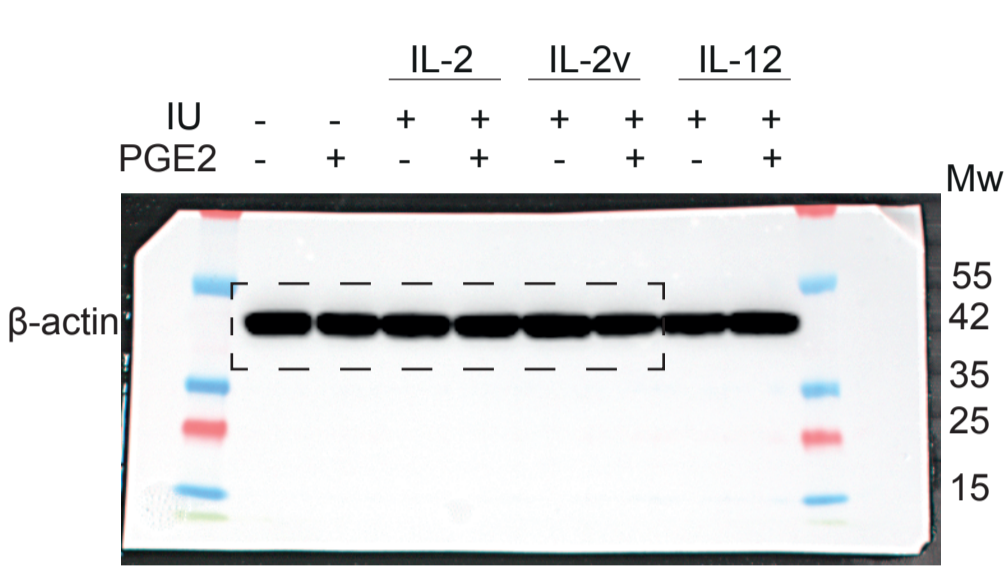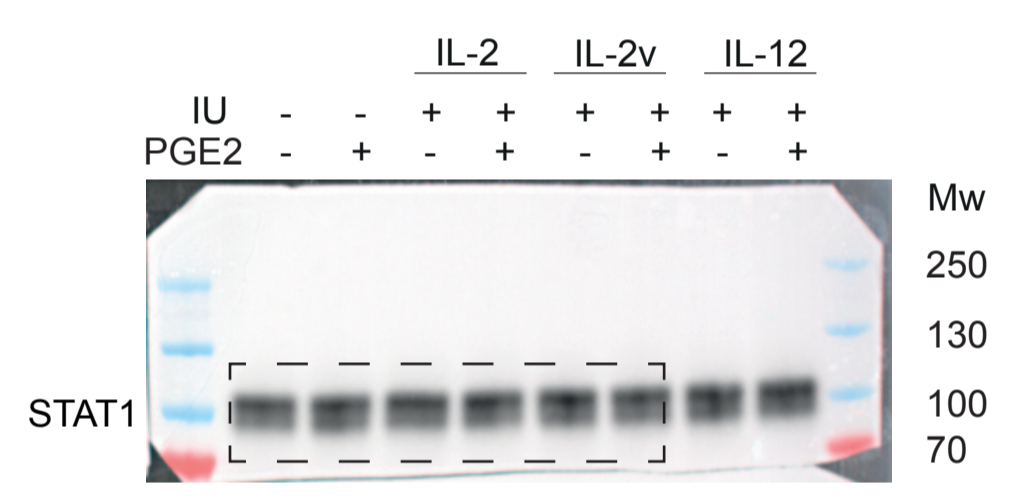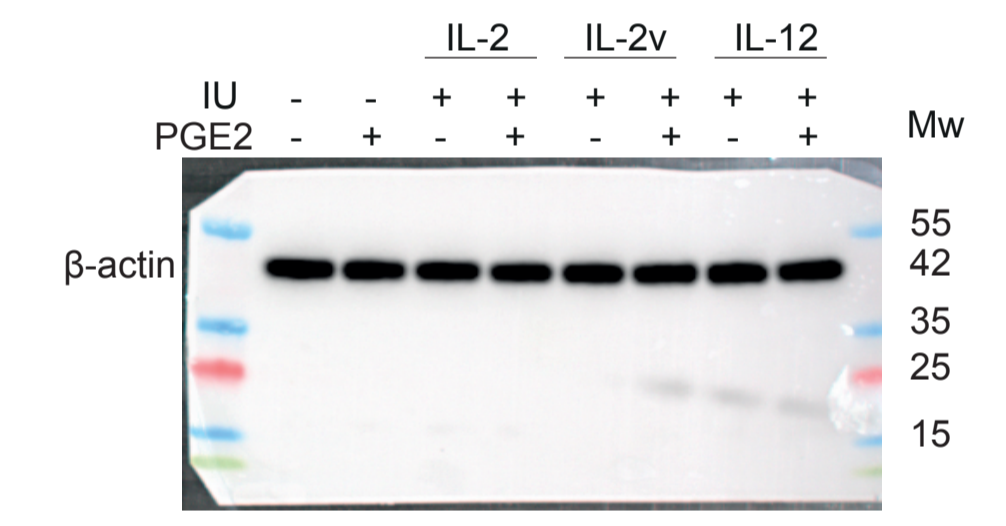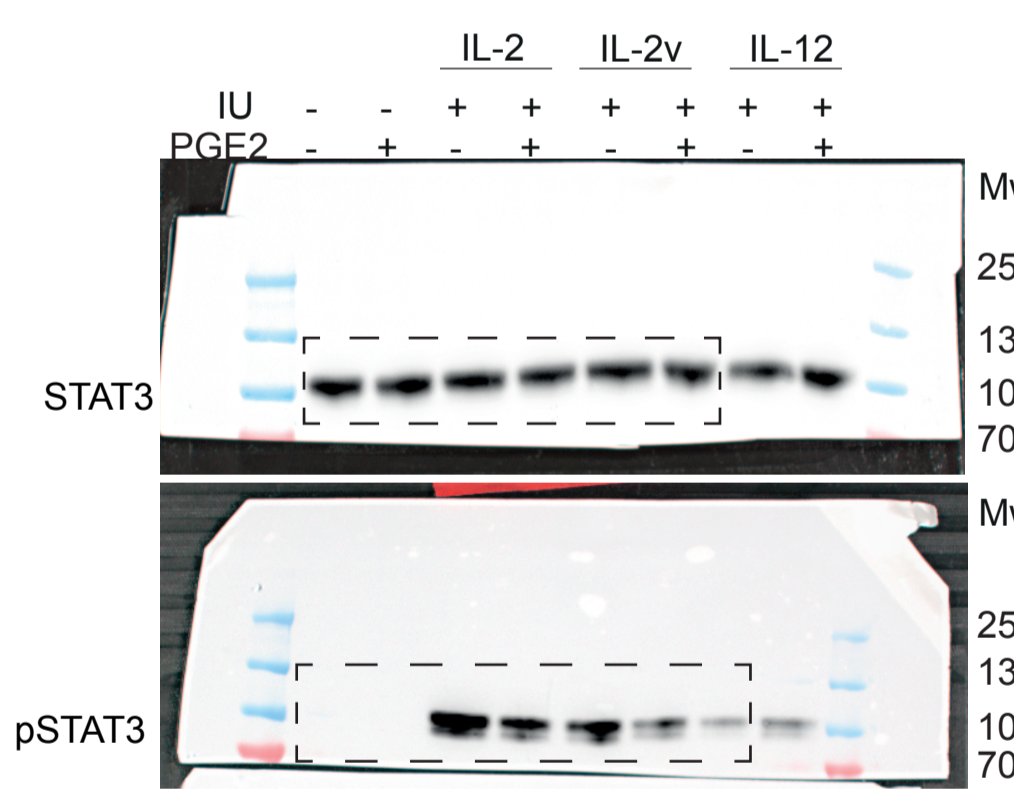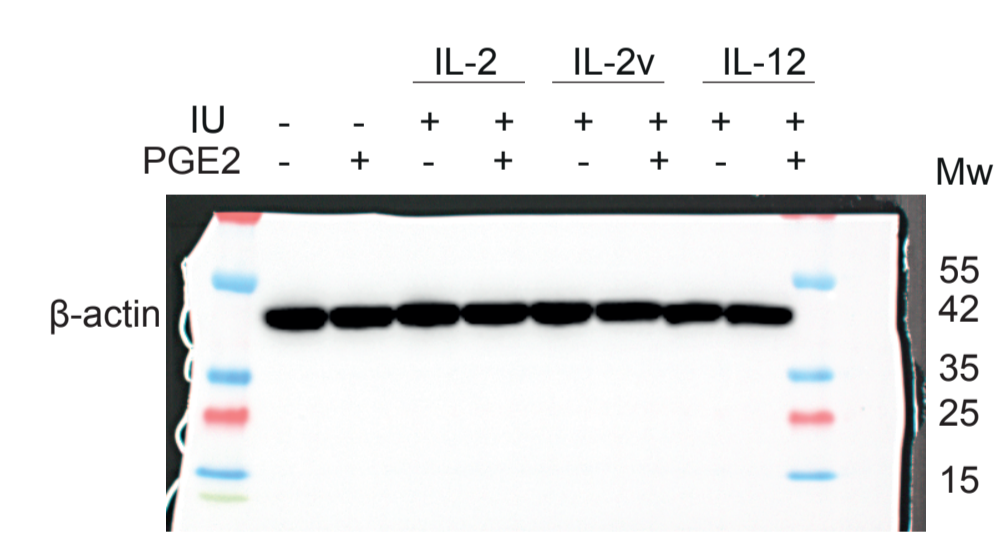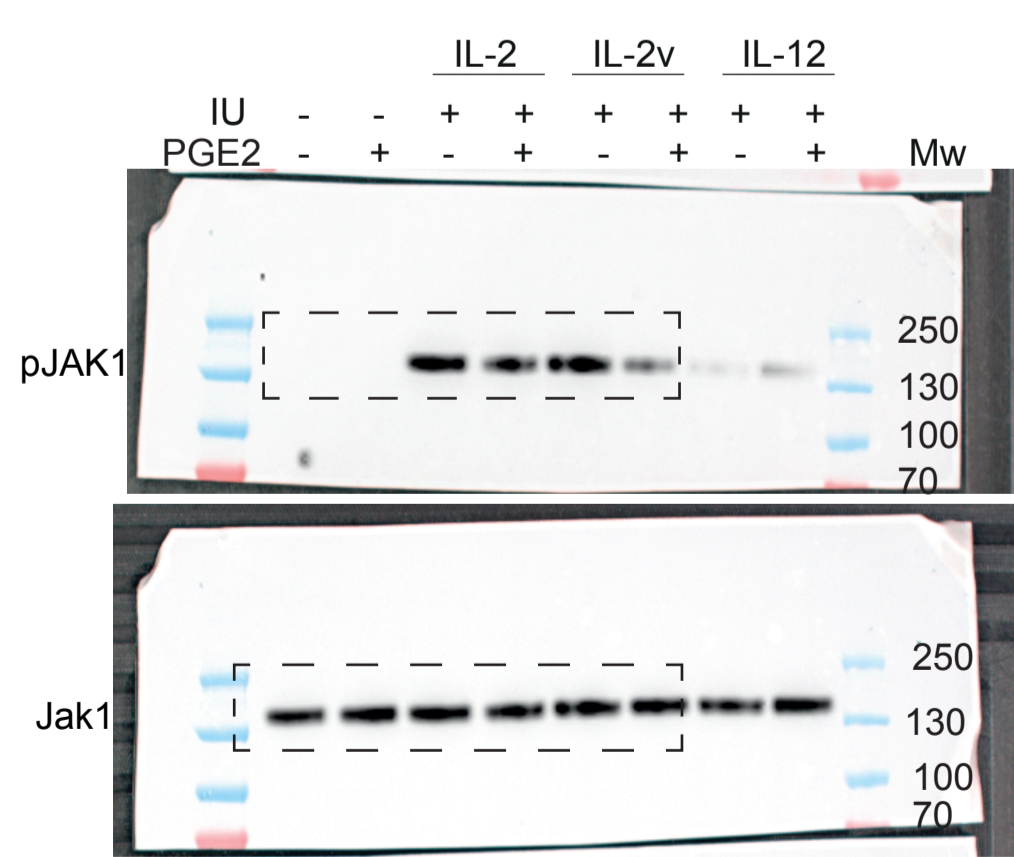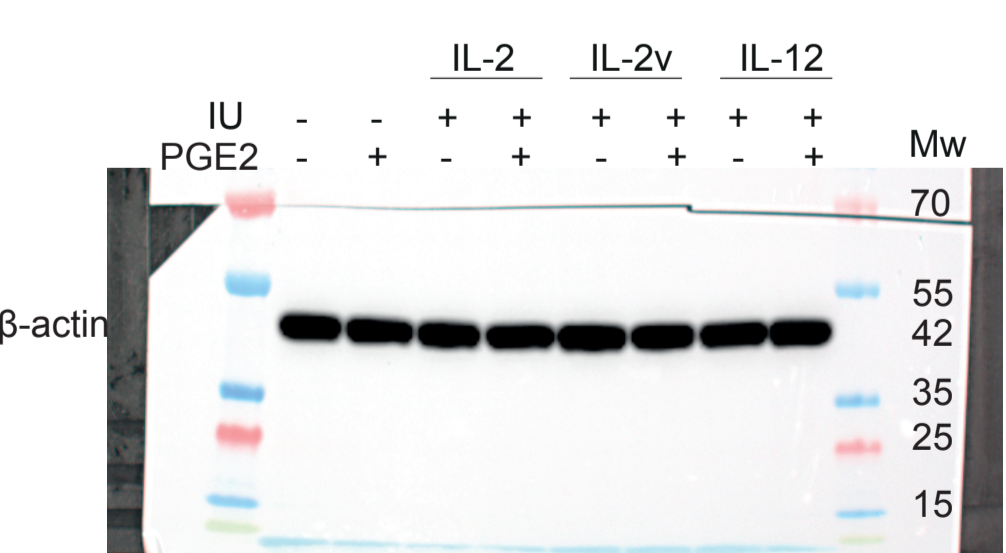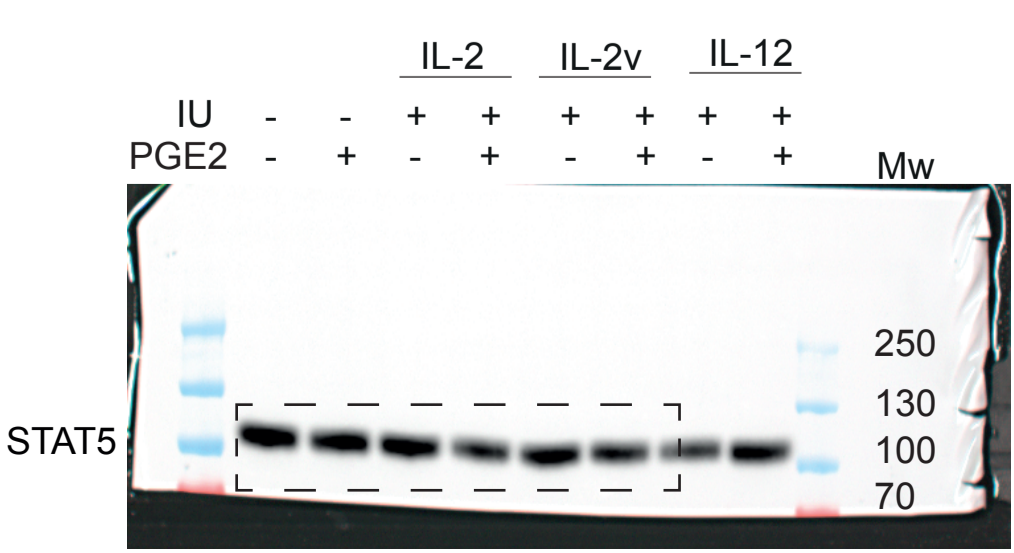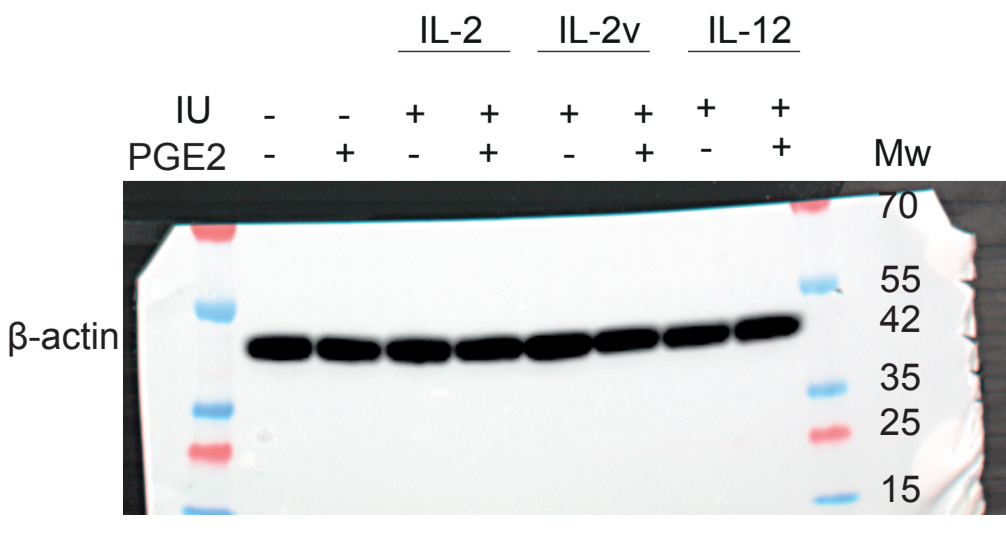

Supplement: 41586_2024_7352_MOESM3_ESM.pdf [file 41586_2024_7352_MOESM3_ESM.pdf]
